# Supplementary material for: A diphenylamino-substituted quinacridone derivative: red fluorescence based on intramolecular charge-transfer transition
Source: Royal Society of Chemistry journal article supplement (doi:10.1039/c6ra01094f), 2016-01-01
Supplement: c6ra01094f1.pdf [file c6ra01094f1.pdf]

## Supporting Information

### Diphenylamino-substituted quinacridone derivative: red fluorescence based on intramolecular charge-transfer transition

Chenguang Wang, Shipan Wang, Weiping Chen, Zuolun Zhang,\* Hongyu Zhang and Yue Wang

State Key Laboratory of Supramolecular Structure and Materials, College of Chemistry, Jilin University, Changchun 130012, P. R. China.

### Contents

|                               |       |
|-------------------------------|-------|
| Photophysical properties      | S2-S4 |
| TGA and DSC curves            | S5-S6 |
| Electroluminescent properties | S6-S8 |
| NMR spectra                   | S8-S9 |
| References                    | S9    |

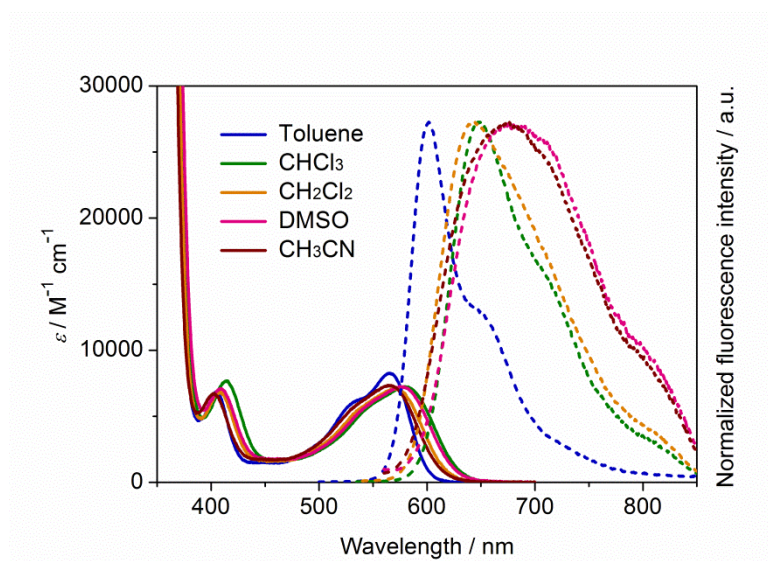

**Fig. S1** Absorption (solid line) and fluorescence (dashed line) spectra of NPh<sub>2</sub>-QA in various solvents.

**Table S1** Photophysical data of NPh<sub>2</sub>-QA in various solvents.

| Solvents                        | $\Delta f^a$ | $\lambda_{\text{abs}} / \text{nm}$ | $\epsilon / 10^4 \text{ M}^{-1} \text{ cm}^{-1}$ | $\lambda_{\text{em}} / \text{nm}$ | Stokes shift / $\text{cm}^{-1}$ |
|---------------------------------|--------------|------------------------------------|--------------------------------------------------|-----------------------------------|---------------------------------|
| Toluene                         | 0.0131       | 566                                | 0.83                                             | 602                               | 1057                            |
| CHCl <sub>3</sub>               | 0.1482       | 579                                | 0.73                                             | 649                               | 1863                            |
| CH <sub>2</sub> Cl <sub>2</sub> | 0.2171       | 570                                | 0.71                                             | 644                               | 2016                            |
| DMSO                            | 0.2630       | 575                                | 0.73                                             | 677                               | 2620                            |
| CH <sub>3</sub> CN              | 0.3046       | 564                                | 0.73                                             | 674                               | 2894                            |

<sup>a</sup> orientation polarizability of the solvent.

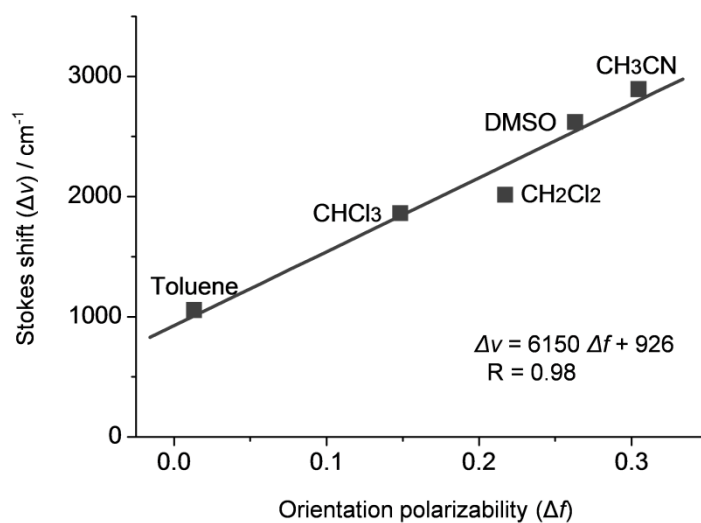

**Fig. S2** Lippert–Mataga plot of NPh<sub>2</sub>-QA.

**Lippert-Mataga plots.** Lippert-Mataga equation<sup>1</sup> expresses the Stokes shift  $\Delta\nu$  as a function of the solvent orientation polarizability  $\Delta f$ :

$$\begin{aligned}\Delta\nu &= \frac{1}{4\pi\epsilon_0} \frac{2(\mu_e - \mu_g)^2}{hca^3} \Delta f + \text{constant} \\ &= \frac{(9.05 \times 10^{34})(\mu_e - \mu_g)^2}{a^3} \Delta f [C^{-2}] + \text{constant}\end{aligned}$$

where  $\epsilon_0$  represents dielectric constant of vacuum,  $h$  represents Planck constant,  $c$  represents light velocity,  $a$  represents radius of Onsager cavity,  $\mu_g$  and  $\mu_e$  represent the dipole moment in ground and excited states, respectively.  $C$  is the unit of quantity of electric charge. For NPh<sub>2</sub>-QA, DFT-calculation at B3LYP/6-31G\* level gives  $a$  value of 6.65 Å. Based on the Lippert-Mataga equation, the difference of dipole moment between ground and excited states ( $\mu_e - \mu_g$ ) is 13.4 D.

**Table S2** Fluorescence quantum yields of C<sub>8</sub>-QA and NPh<sub>2</sub>-QA in various solvents.

| Compound             | Toluene | CHCl <sub>3</sub> | CH <sub>2</sub> Cl <sub>2</sub> | DMSO | CH <sub>3</sub> CN |
|----------------------|---------|-------------------|---------------------------------|------|--------------------|
| C <sub>8</sub> -QA   | 0.96    | 0.97              | 0.96                            | 0.95 | 0.96               |
| NPh <sub>2</sub> -QA | 0.56    | 0.13              | 0.09                            | 0.02 | 0.02               |

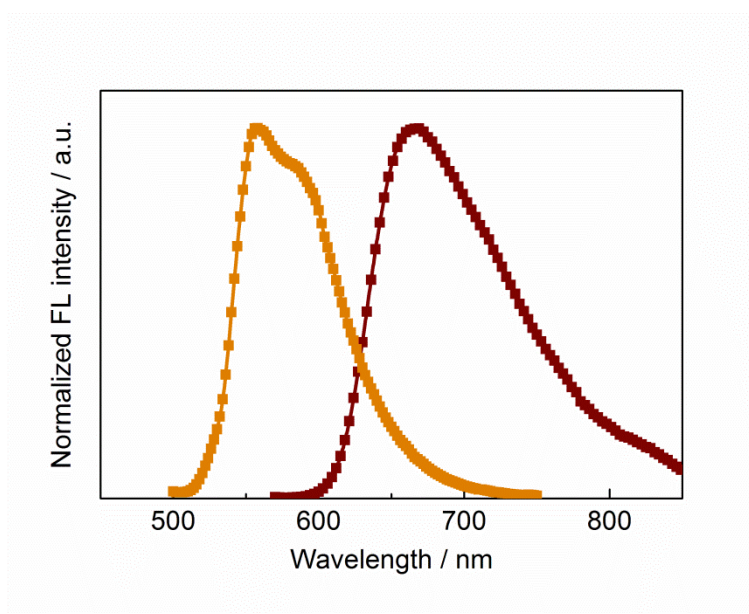

**Fig. S3** Fluorescence spectra of solid thin films of C<sub>8</sub>-QA (yellow line) and NPh<sub>2</sub>-QA (deep red line).

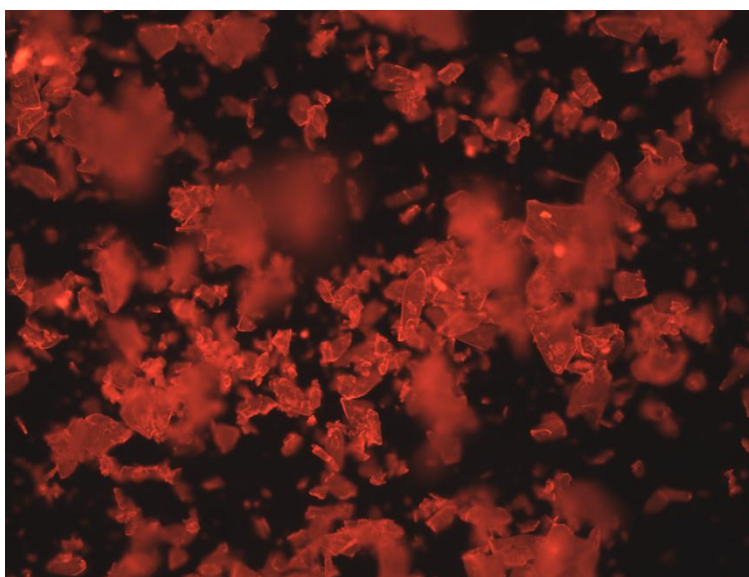

**Fig. S4** Fluorescence microscopy image of the crystalline powder of NPh<sub>2</sub>-QA.

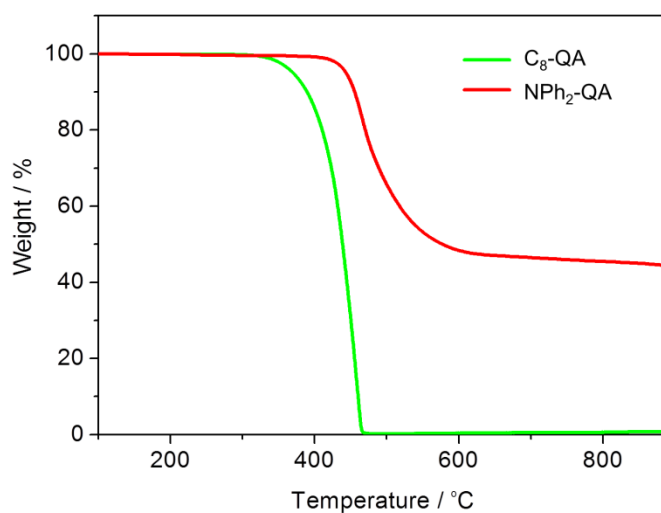

**Fig. S5** TGA curves of C<sub>8</sub>-QA and NPh<sub>2</sub>-QA.

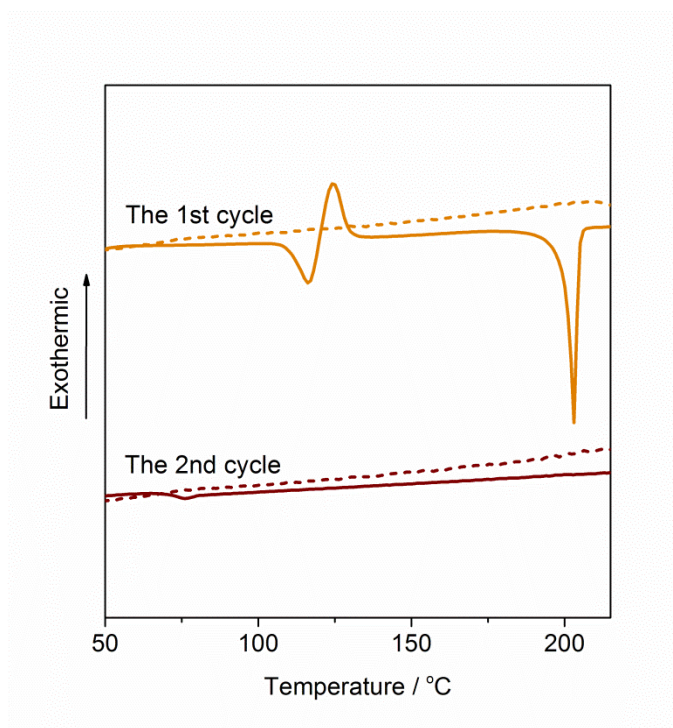

**Fig. S6** Two heating (solid line)-cooling (dashed line) cycles of the DSC measurements of NPh<sub>2</sub>-QA.

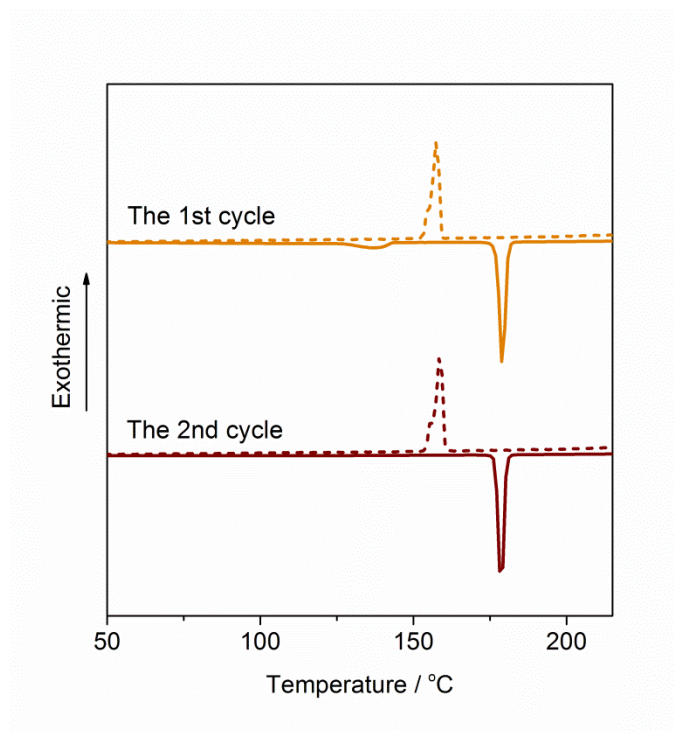

**Fig. S7** Two heating (solid line)-cooling (dashed line) cycles of the DSC measurements of C<sub>8</sub>-QA.

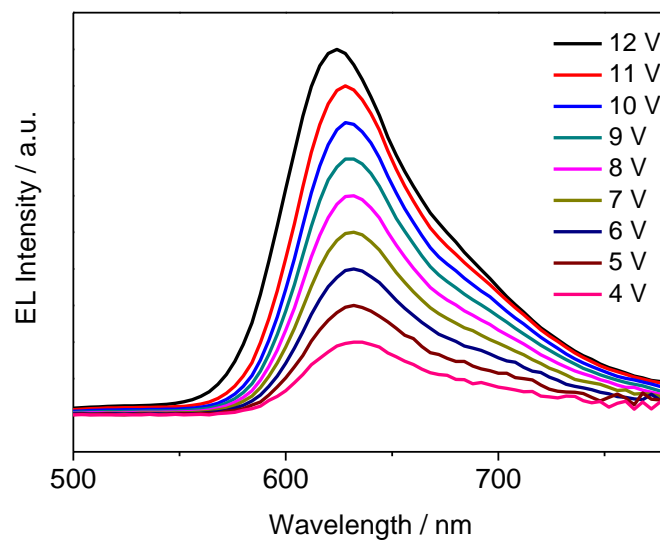

**Fig. S8** EL spectra of the OLED device at different driving voltages.

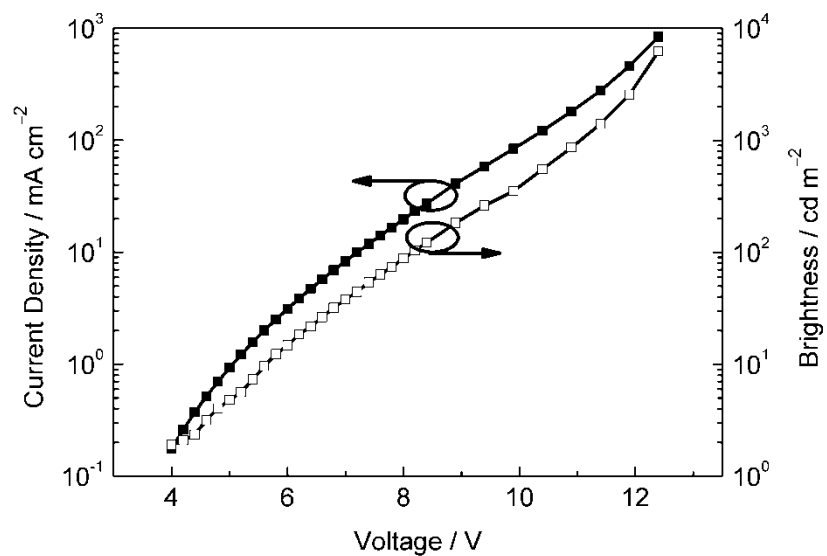

**Fig. S9** Current density–Voltage–Brightness characteristics of the OLED device.

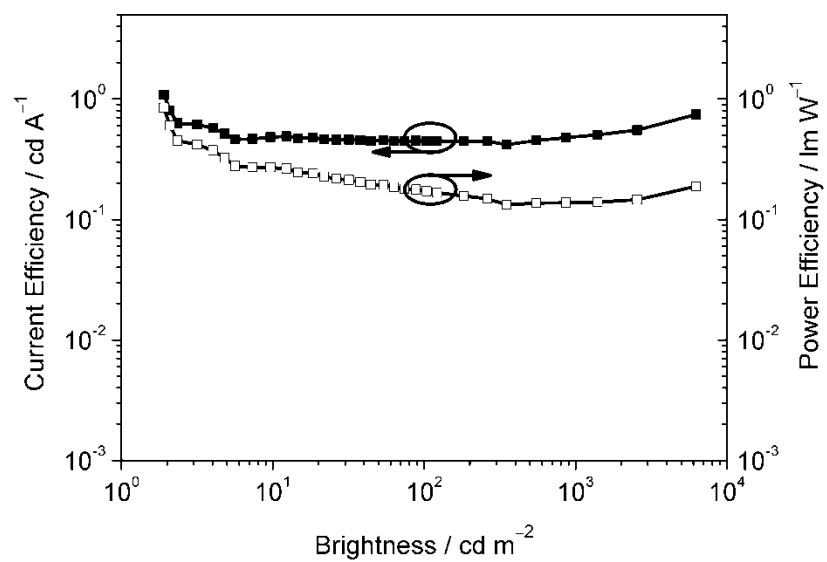

**Fig. S10** Current efficiency and power efficiency *versus* brightness characteristics of the OLED device.

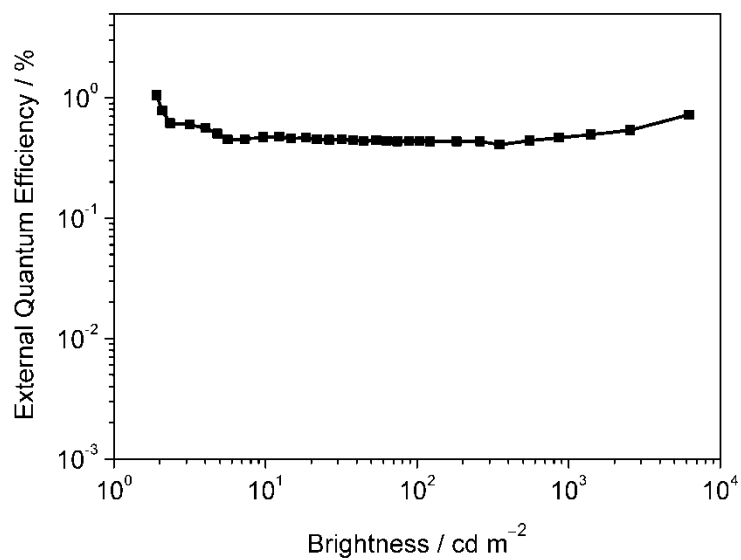

**Fig. S11** External quantum efficiency *versus* brightness characteristics of the OLED device.

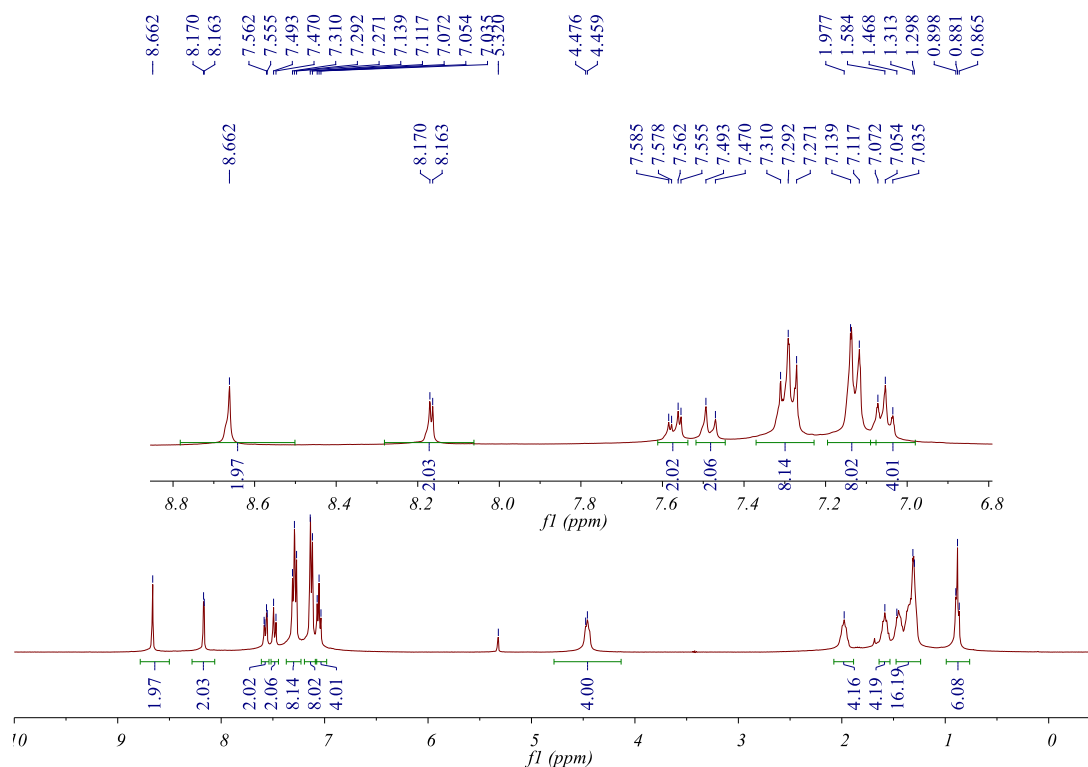

**Fig. S12**  $^1\text{H}$  NMR spectrum of  $\text{NPh}_2\text{-QA}$  (400 MHz,  $\text{CD}_2\text{Cl}_2$ ).



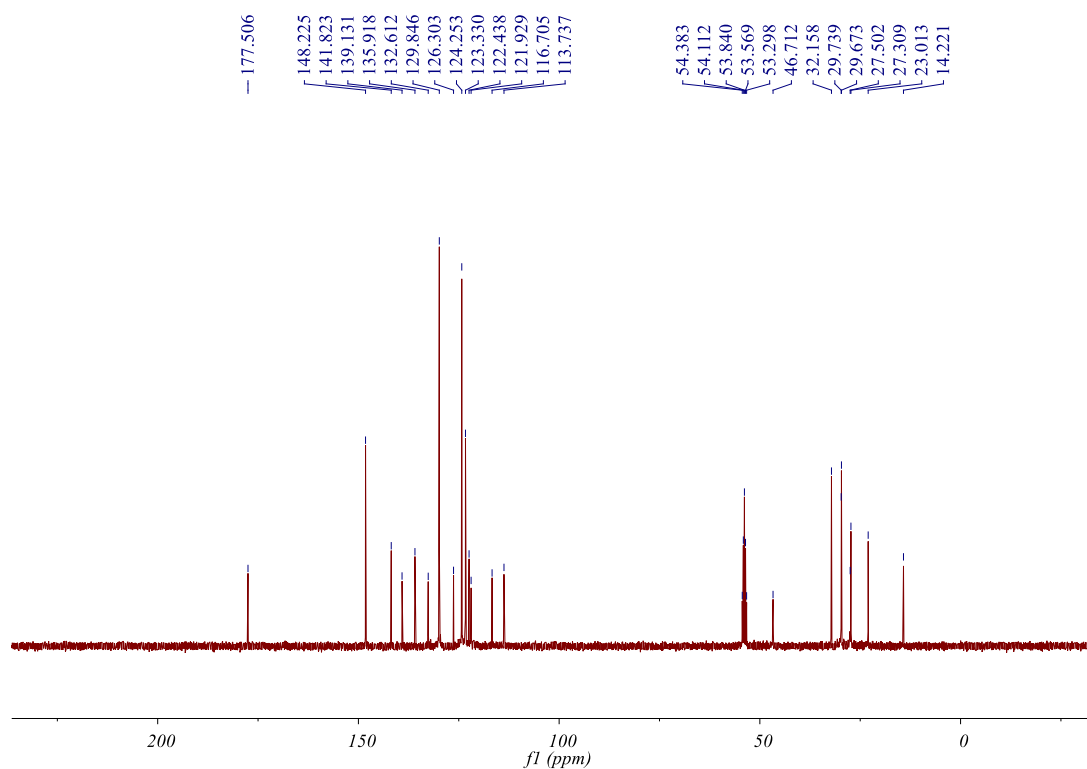

**Fig. S13**  $^{13}\text{C}\{^1\text{H}\}$  NMR spectrum of  $\text{NPh}_2\text{-QA}$  (100 MHz,  $\text{CD}_2\text{Cl}_2$ ).

## References

[1] *Principles of Fluorescence Spectroscopy*, e.d. J. R. Lakowicz, Springer, 3rd edn., New York, 2006.
